# Supplementary figures and images for: Combined Effect of High Hydrostatic Pressure and Proteolytic Fraction P1G10 from Vasconcellea cundinamarcensis Latex against Botrytis cinerea in Grape Juice
Source: MDPI journal article supplement (doi:10.3390/foods12183400), 2023-09-12

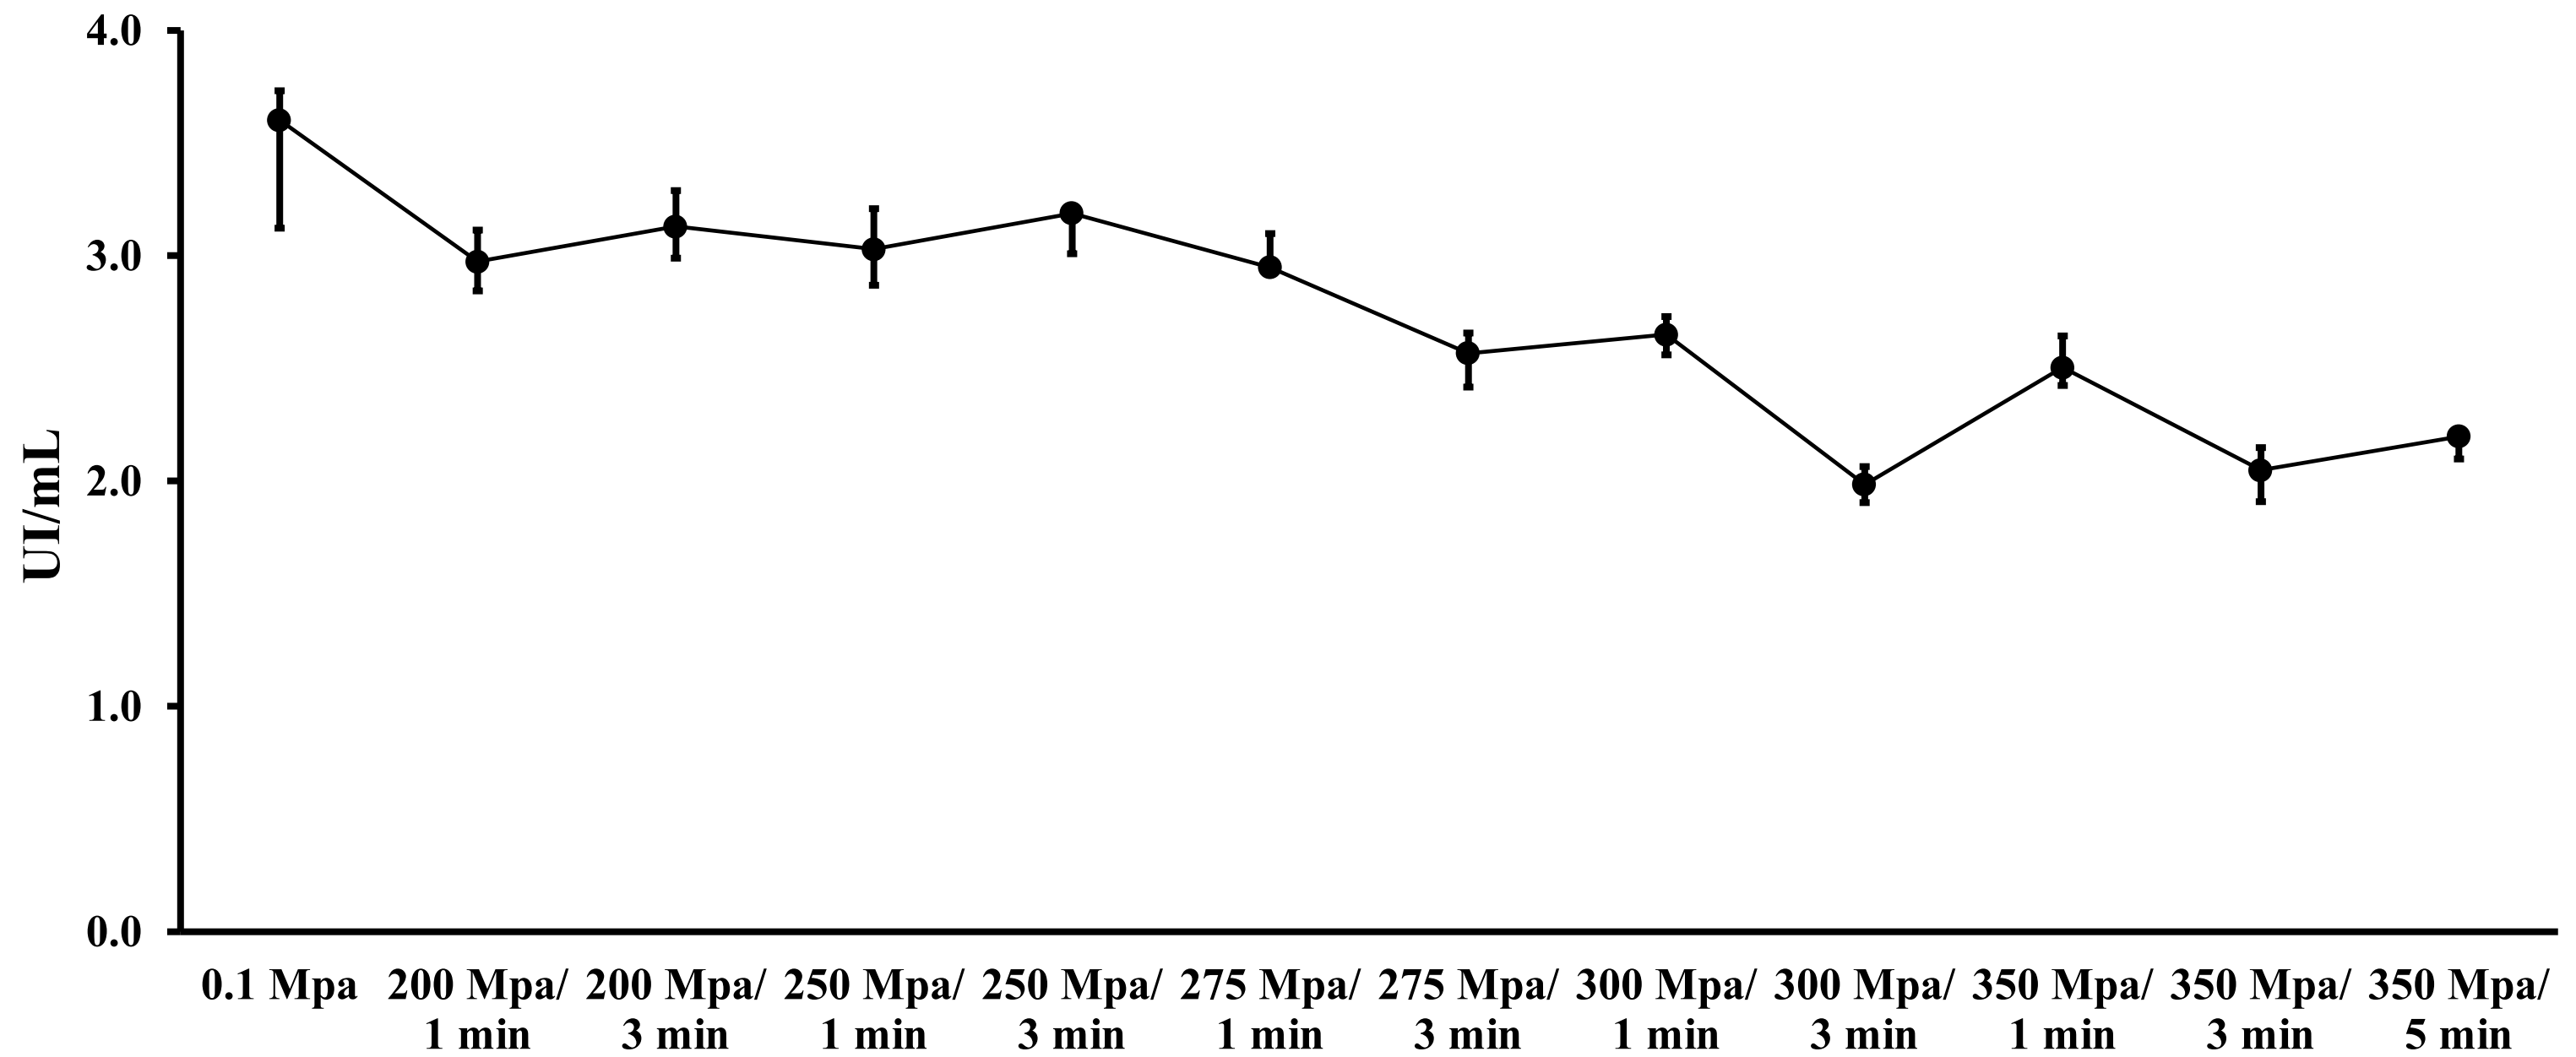

Supplement: s1 [file s1]
